# Supplementary material for: The Impact of the COVID-19 Pandemic on Bladder Cancer Care in the Netherlands
Source: PubMed Central journal article supplement — Bladder Cancer. 2022 Jun 3;8(2):139–54. doi: 10.3233/BLC-211608 (PMC11181832; doi:10.3233/blc-211608), 2022-06-03
Supplement: blc-8-blc211608-s002.pdf [file blc-8-blc211608-s002.pdf]

Supplementary Table 1: number of transurethral resections of the bladder tumor (TURBTs) overall and by pathology result and number of radical cystectomies (RCs) performed over time in the Netherlands (source: PALGA, NCR)

|                       | <b>2015</b>  | <b>2016</b>  | <b>2017</b>  | <b>2018</b>  | <b>2019</b>     | <b>2020</b>    |
|-----------------------|--------------|--------------|--------------|--------------|-----------------|----------------|
|                       | <b>N (%)</b>    | <b>N (%)</b>   |
| <b>Total N TURBTs</b> | 8094 -       | 8546 (+5.6%) | 9049 (+5.9%) | 9592 (+6.0%) | 10.576 (+10.6%) | 10.527 (-0.5%) |
| Benign tissue         | 1786 (22.1)  | 1775 (20.8)  | 1854 (20.5)  | 1998 (20.8)  | 2273 (21.5)     | 2141 (20.3)    |
| Malign tissue         | 6270 (77.5)  | 6736 (78.8)  | 7173 (79.3)  | 7573 (79.0)  | 8274 (78.2)     | 8360 (79.4)    |
| No pathology result   | 38 (0.5)     | 35 (0.4)     | 22 (0.2)     | 21 (0.2)     | 29 (0.3)        | 26 (0.2)       |
| <b>Total N RCs</b>    | 925 -        | 890 (-3.8%)  | 934 (+4.9%)  | 932 (-0.2%)  | 808 (-13.3%)    | 820 (+1.5%)    |
